# Supplementary material for: Tuning of multiple luminescence outputs and white-light emission from a single gelator molecule through an ESIPT coupled AIEE process
Source: Royal Society of Chemistry journal article supplement (doi:10.1039/c4cc09211b), 2014-12-08
Supplement: c4cc09211b1.pdf [file c4cc09211b1.pdf]

## **Supporting Information**

### **Tuning of multiple luminescence output and white-light emission from a single gelator molecule through ESIPT coupled AIEE process**

Arunava Maity,<sup>a,\*</sup> Firoj Ali,<sup>a</sup> Hridesh Agarawal,<sup>a</sup> Bihag Anothumakkool<sup>b</sup> and Amitava Das<sup>a,\*</sup>

<sup>a</sup>Organic Chemistry Division, <sup>b</sup>Physical & Materials Chemistry Division, CSIR-National Chemical Laboratory, Pune-411008, Maharashtra, India; E-mail: [a.das@ncl.res.in](mailto:a.das@ncl.res.in); Fax: +91 2025902629; Tel: +91 2025902385.

| <b>Table of contents:</b>                                    | <b>Page No</b> |
|--------------------------------------------------------------|----------------|
| Materials and methods                                        | S3             |
| General description of different experimental techniques     | S4             |
| Synthetic scheme                                             | S5             |
| Synthesis and characterization of [4]                        | S6             |
| Synthesis and characterization of [1] and [2]                | S6             |
| References                                                   | S7             |
| <sup>1</sup> H NMR spectra of [4]                            | S8             |
| <sup>13</sup> C NMR spectra of [4]                           | S9             |
| Mass spectra of [4]                                          | S10            |
| <sup>1</sup> H NMR spectra of [1]                            | S11            |
| <sup>13</sup> C NMR spectra of [1]                           | S12            |
| Mass spectra of [1]                                          | S13            |
| <sup>1</sup> H NMR spectra of [2]                            | S14            |
| <sup>13</sup> C NMR spectra of [2]                           | S15            |
| Mass spectra of [2]                                          | S16            |
| UV-Vis absorption spectra of [1]                             | S17            |
| Variable-temperature UV-Vis absorption spectra of [1]        | S17            |
| Weight-loss profile (TGA plot) of [1]                        | S18            |
| Comparisons between absorption and excitation spectra of [1] | S18            |
| UV-Vis absorption spectra of [2]                             | S20            |
| Solvent dependent emission spectra of [2]                    | S21            |
| Emission spectra of [1] in different polarities of solvents  | S21            |
| Comparisons of FT-IR spectrum between compound [1] and [2]   | S22            |
| Gelation study of [2]                                        | S23            |
| Photographs showing the changes of emission color of [1]     | S23            |
| Schematic route for gelation of [1]                          | S24            |
| Rheological property of [1]                                  | S25            |
| XRPD pattern of [1]                                          | S25            |
| <i>I</i> - <i>V</i> characteristic plot of [1]               | S26            |
| Solvent dependent FESEM images of [1]                        | S26            |

## **Materials and methods:**

Unless otherwise stated, all reagents used for synthesis purpose were purchased from commercial suppliers, and used as such without further purification. Organic solvents were purified according to the standard procedure.<sup>1</sup> HPLC grade solvents were used for recording spectrometric data. FTIR spectra were recorded as KBr pellets in a cell fitted with a KBr window, using a Perkin-Elmer Spectra GX 2000 spectrometer. <sup>1</sup>H and <sup>13</sup>C NMR spectra have been recorded on a Bruker 200/400/500 MHz FT NMR (Model: Avance-DPX 200/500) and all spectra were calibrated against TMS. Mass spectrometric data were acquired by an electron spray ionization (ESI) technique on a Q-tof-micro quadrupole mass spectrometer (Micro mass). High-resolution mass spectra were recorded on JEOL JM AX 505 HA mass spectrometer. Thermo-gravimetric analyses (TGA) were carried out on a TG50 analyzer (Mettler-Toledo) or a SDT Q600 TG-DTA analyzer under a N<sub>2</sub> atmosphere at a heating rate of 10 °C min<sup>-1</sup> within a temperature range of 20–800 °C. UV-Vis spectra were recorded using a PerkinElmer Lambda-950 UV-Vis spectrometer equipped with a peltier system for variable temperature experiments, while fluorescence as well as fluorescence excitation spectra were recorded using Quanta Master 400, PTI spectrofluorometer. FESEM images were obtained using Nova Nano SEM 450 and Quanta™ Scanning Electron Microscope. TEM images were recorded using a FEI Tecnai G2 F20 X-TWIN TEM at an accelerating voltage of 200 kV. Rheology was performed using a TA-ARES rheometer equipped with a force rebalance transducer. X-ray powder diffraction (XRPD) of air dried THF gel of **1** were recorded on a Phillips PANalytical diffractometer for Cu K<sub>α</sub> radiation ( $\lambda = 1.5406 \text{ \AA}$ ).

### **General description of different experimental techniques:**

**UV-Vis and Fluorescence spectrum measurements:** Stock solutions of both compounds (**1** and **2**) were made in THF (1.0  $\mu$ M). An aliquot (0.5 mL) was taken and was added with an appropriate amount of THF and water (H<sub>2</sub>O) to adjust the desired solvent composition and final concentration (10  $\mu$ M). Each solution was allowed to equilibrate at room temperature for 1h before spectral measurements. For variable-temperature experiments compound-**1** solution in THF/Water (3:7) was heated from lowest to highest temperature and allowed to equilibrate for 15 min at the desired temperature before each measurement. All luminescence measurements were recorded using,  $\lambda_{\text{Ext}} = 365$  nm and 306 nm for compound **1** and **2** respectively with an emission slit width of 2 nm. Fluorescence excitation spectra were recorded using the same solution used for fluorescence studies.

**General procedure for gelation study:** Due to the limited solubility of **1** in common organic solvent, gelation property of **1** was checked with three specified solvents, namely DMF, DMSO and THF. Compound **1** was highly soluble in DMF and DMSO, which were not suitable for studying the gelation phenomena. Whereas in case of THF solvent, A weighted amount **1** was dissolved in THF (1.0 mL) by heating in closed vials. The clear solution was left to cool down in air at 25°C without any disturbance. The gel formation was confirmed by the failure of the soft mass to flow by inverting the glass vial.

**Scanning electron microscopy (SEM):** A solution of **1** (100  $\mu$ M) in THF as well as in different composition of THF/water mixture were drop-casted on silicon wafer and allowed to air dry for 6-7 hrs in a dust free place. Finally it was dried under desiccator for overnight. Before taking images samples were coated with gold vapor.

**Transmission Electron Microscopy (TEM):** TEM samples were prepared drop-casting the 1.0 mM THF solution of **1** onto carbon coated copper grids (200 mesh). TEM images were obtained after drying the sample in vacuum for 24 hours.

**Current (I) - voltage (V) measurements:** The gel solution of **1** (10.0 mg/mL of THF) was drop-casted on indium tin oxide (ITO) coated glass surfaces and dried for 24 hrs at room temperature. *I-V* characteristic profile of this sample was measured in a two-probe electrode using a KEITHLEY 4200-SCS programmable electrometer instrument.

**Synthetic scheme:**

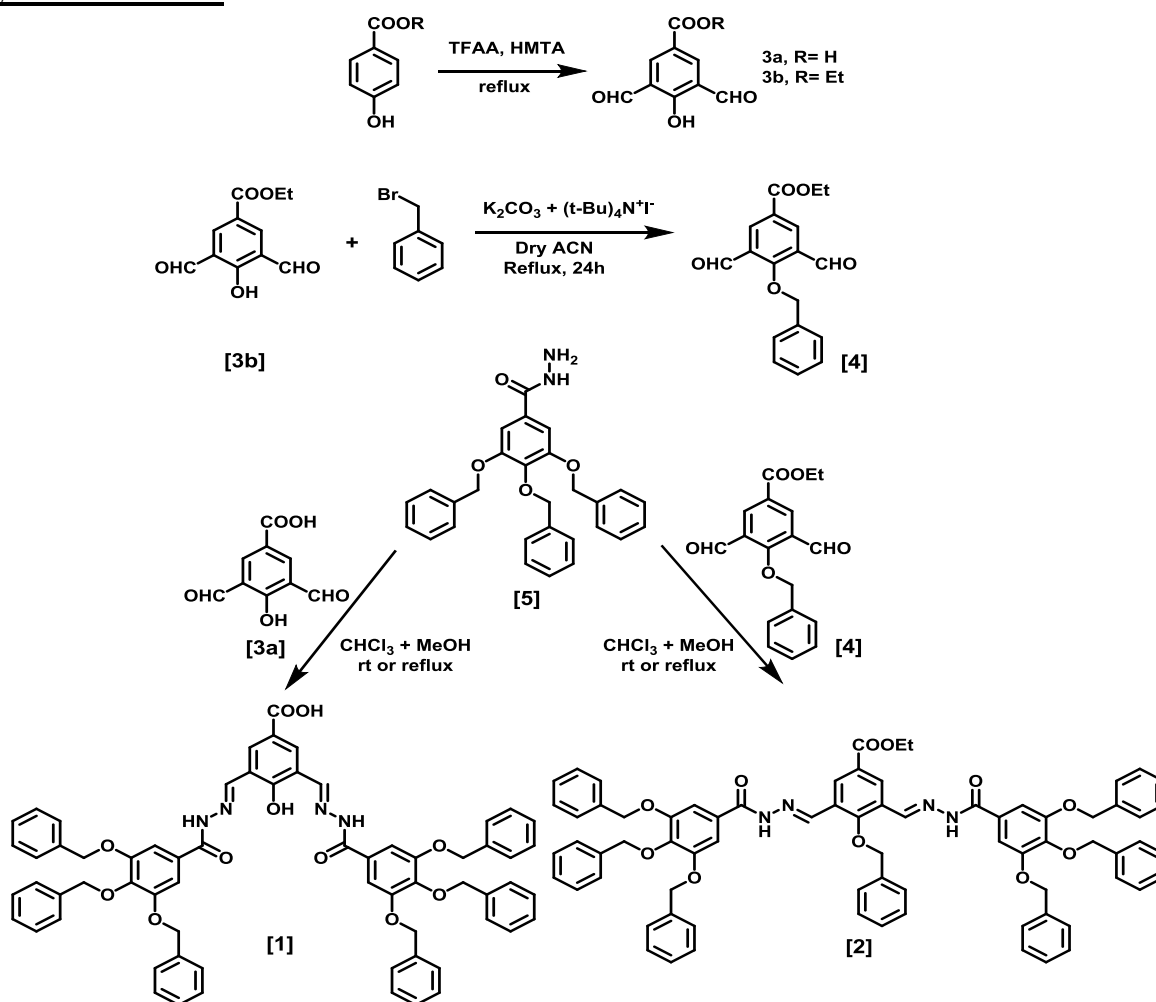

**Scheme-1:** Methodologies that were adopted for synthesis of **[1]**, **[2]**, **[3a & 3b]**, **[4]** and **[5]**.

**Synthesis of [3a & 3b]:** 3a and 3b were synthesized following the previously reported procedure.<sup>2</sup>

**Synthesis and characterization of [4]:** In a 100 mL two neck RB 3,5-bisformyl-4-hydroxy ethyl benzoate [3b]<sup>2</sup> (200.0 mg, 0.9 mMol), commercially available benzyl bromide (169.5 mg, 0.99 mMol), anhydrous K<sub>2</sub>CO<sub>3</sub> were mixed in 20~25 mL dry acetonitrile (ACN). Followed by a pinch of tertiary butyl ammonium iodide (tBu)NH<sub>4</sub><sup>+</sup>I<sup>-</sup> was added and was reflux for 24 h under N<sub>2</sub> atmosphere. The reaction mixture was cooled to room temperature; solvent was then removed under reduced pressure using a rotary evaporator. Oily residue was taken in 80 mL of CHCl<sub>3</sub>, and washed with distilled water (3 X 30 mL). Organic layer dried over anhydrous Na<sub>2</sub>SO<sub>4</sub>. Finally solvent was evaporated to get crude product as a color less oil. It was purified by column chromatography using silica gel as stationary phase and 25% ethyl acetate in hexane as eluent to obtain pure product as white solid. Yield = 35%, <sup>1</sup>H NMR (CDCl<sub>3</sub>, 200 MHz, TMS): δ (ppm) = 10.23 (2H, s, -CHO); 8.72 (2H, s, ArH); 7.41-7.36 (3H, m, ArH); 7.32-7.29 (2H, m, ArH); 5.24 (2H, s, -CH<sub>2</sub>); 4.47-4.36 (2H, q, *J* = 7Hz, -CH<sub>2</sub> ester); 1.44-1.37 (3H, t, *J* = 7.2Hz, -CH<sub>3</sub> ester); <sup>13</sup>C NMR (CDCl<sub>3</sub>, 400 MHz, TMS): δ (ppm) = 14.72, 59.51, 61.84, 81.71, 127.52, 128.98, 129.06, 129.56, 130.57, 134.02, 138.35, 164.35, 165.81, 187.82; **HRMS (ESI):** m/z calculated for C<sub>18</sub>H<sub>16</sub>O<sub>5</sub>Na [M + Na]<sup>+</sup>: 335.0890; found 335.0884.

**Synthesis of [5]:** Compound [5] was synthesized according to the previously reported procedure.<sup>3</sup>

**Synthesis and characterization of [1] and [2]:** Synthetic procedure of both compounds was followed according to reported procedure<sup>3</sup> with slide modification: A solution of compound [3a] (136.2 mg, 0.7 mMol) or [4] (219.1 mg, 0.7 mMol) in methanol was added drop wise to a CHCl<sub>3</sub> solution of compound [5] (638.0 mg, 1.4 mMol). The reaction mixture was stirred at room

temperature for 9~10 hour, resulting precipitate [for compound-**1** (yellow) and for compound-**2** (color less)] was filtered off using G4-gooch crucible. Washed with (1:1) CHCl<sub>3</sub>/MeOH mixture several times, dried under desiccator to obtain the pure product.

**[1]:** Yield = 90%; <sup>1</sup>H NMR (DMSO-d<sub>6</sub>, 500 MHz, TMS): δ (ppm) = 13.30 (1H, s, -COOH); 12.18 (2H, s, -NH); 8.82 (2H, s, -CH=N); 8.34 (2H, s, ArH); 7.51-7.49 (8H, d, *J* = 7Hz, ArH); 7.45-7.40 (12H, m, ArH); 7.37-7.36 (8H, m, ArH), 7.28-7.27 (6H, m, ArH); 5.22 (8H, s, ArCH<sub>2</sub>O); 5.04 (4H, s, ArCH<sub>2</sub>O); <sup>13</sup>C NMR (DMSO-d<sub>6</sub>, 400 MHz, TMS): δ (ppm) = 70.44, 74.22, 106.95, 120.23, 122.18, 127.65, 127.82, 127.91, 128.01, 128.11, 128.39, 130.84, 136.67, 137.30, 140.30, 145.15, 152.08, 159.82, 162.27, 166.37; **HRMS (ESI):** m/z calculated for C<sub>65</sub>H<sub>55</sub>O<sub>11</sub> N<sub>4</sub> [M + H]<sup>+</sup>: 1067.3862; found 1067.3861.

**[2]:** Yield = (84%); <sup>1</sup>H NMR (DMSO-d<sub>6</sub>, 400 MHz, TMS): δ (ppm) = 11.94 (2H, s, -NH); 8.75 (2H, s, -CH=N); 8.57 (2H, s, ArH); 7.56-7.54 (2H, m, ArH); 7.50-7.48 (6H, m, ArCH<sub>2</sub>O); 7.43-7.34 (26H, m, ArH); 7.29-7.27 (5H, m, ArH); 5.22 (8H, s, ArCH<sub>2</sub>O); 5.04 (6H, s, ArCH<sub>2</sub>O); 4.42-4.41 (2H, board, -CH<sub>2</sub> ester); 1.37 (3H, board, -CH<sub>3</sub> ester); <sup>13</sup>C NMR (DMSO-d<sub>6</sub>, 500 MHz, TMS): δ (ppm) = 14.22, 61.22, 70.48, 74.25, 78.44, 107.05, 126.56, 127.56, 127.87, 127.94, 128.05, 128.15, 128.34, 128.41, 128.58, 128.92, 129.20, 135.29, 136.71, 137.31, 140.25, 141.57, 152.07, 159.11, 162.80, 164.77; **HRMS (ESI):** m/z calculated for C<sub>74</sub>H<sub>65</sub>O<sub>11</sub>N<sub>4</sub> [M + H]<sup>+</sup>: 1185.4644; found 1185.4647.

## **References:**

1. Perrin, D. D.; Armarego, W. L. F. Perrin, D. R. Purification of Laboratory Chemicals, 2nd ed., Pergamon, Oxford, 1980
2. Naama Karton-Lifshin, Lorenzo Albertazzi, Michael Bendikov, Phil S. Baran and Doron Shabat, *J. Am. Chem. Soc.*, 2012, **134**, 20412.
3. P. Rajamalli and E. Prasad, *Org. Lett.*, 2011. **13**, 3714.

**$^1\text{H}$  NMR spectra of [4]:**

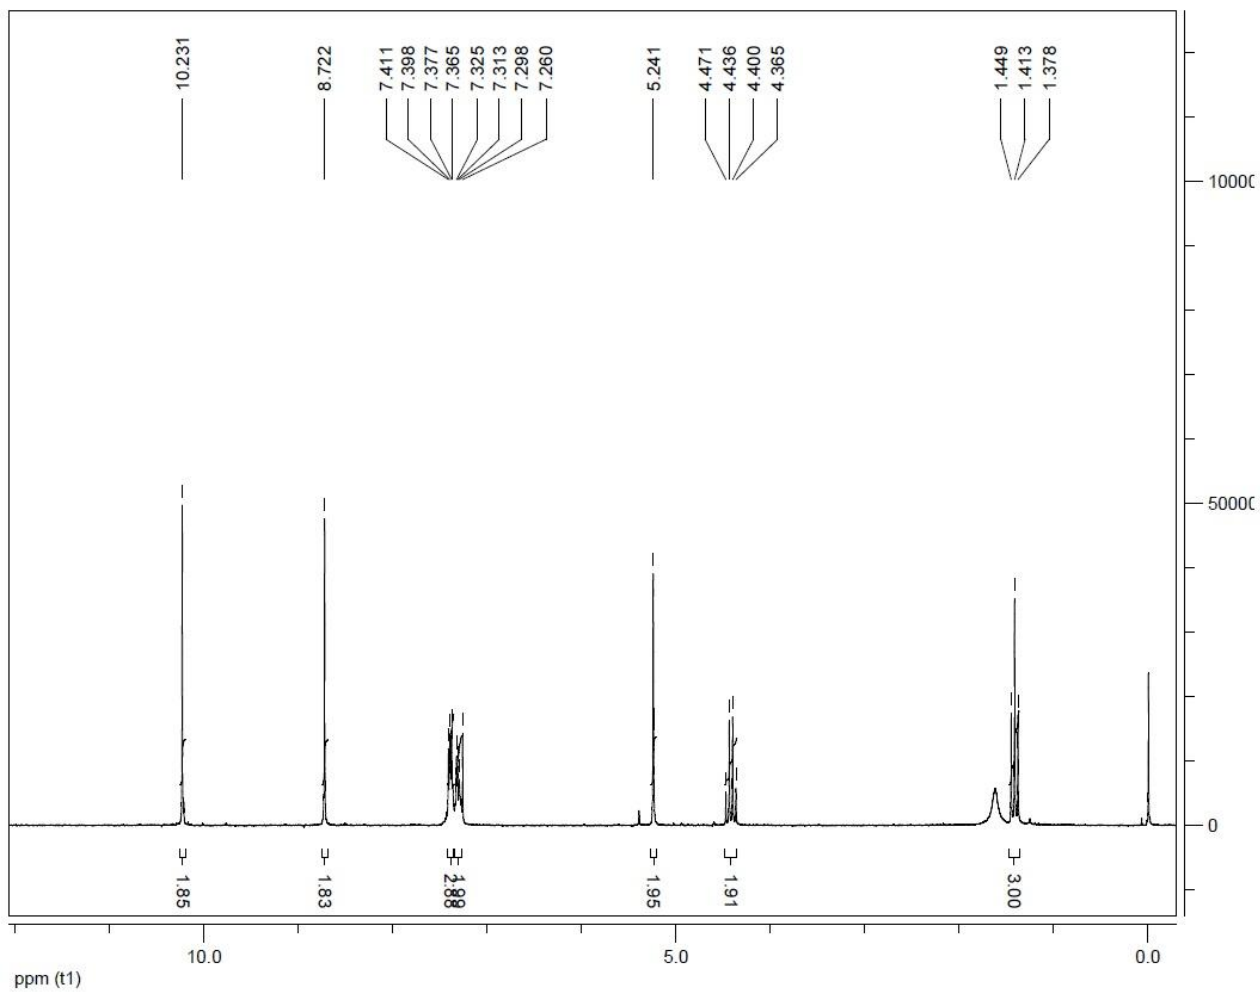

**SI Fig.S1:**  $^1\text{H}$  NMR spectra of [4] in  $\text{CDCl}_3$  recorded in 200 MHz.

**$^{13}\text{C}$  NMR spectra of [4]:**

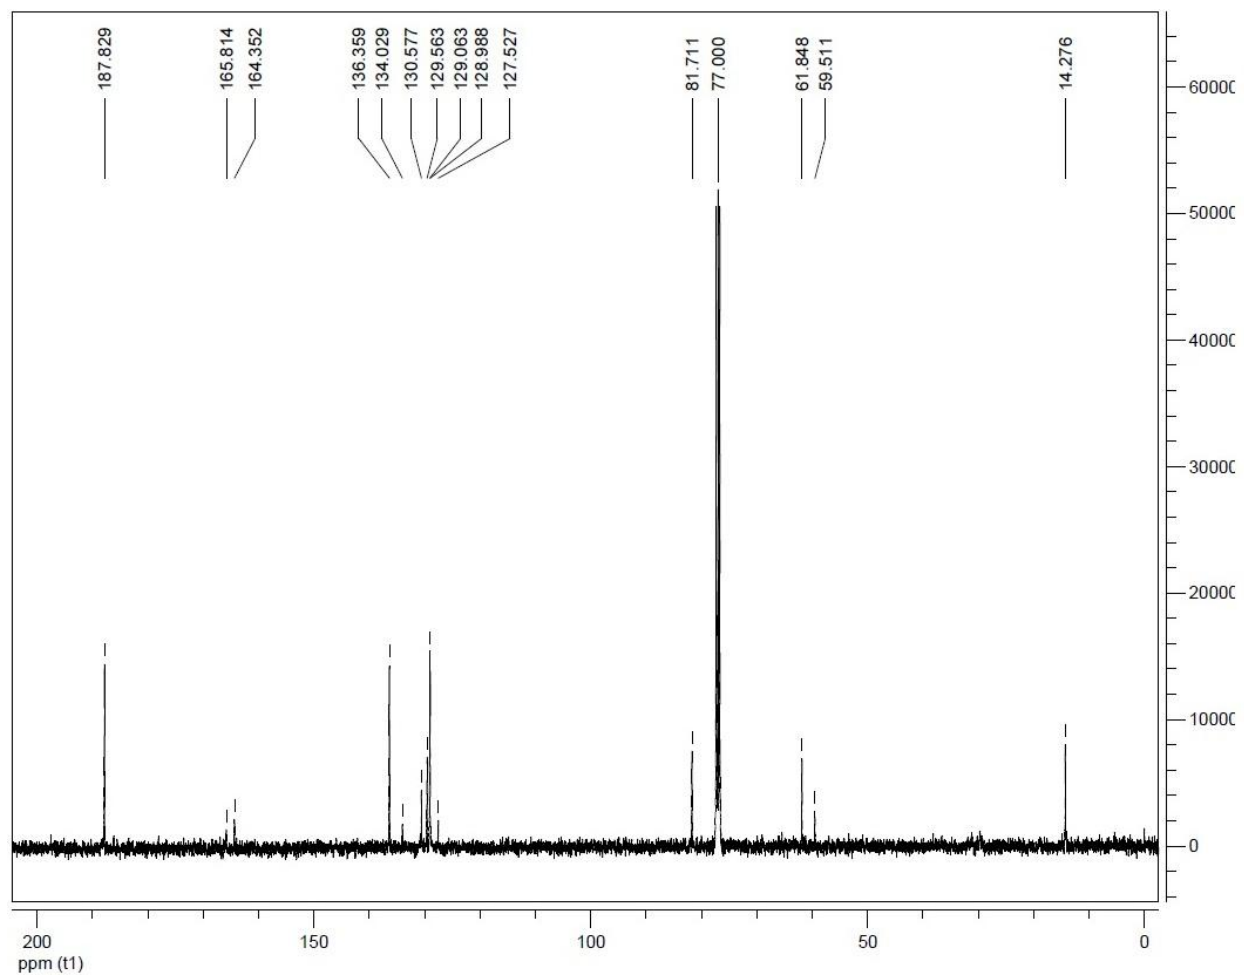

**SI Fig.S2:**  $^{13}\text{C}$  NMR spectra of [4] in  $\text{CDCl}_3$  recorded in 400 MHz.

## Mass spectra of [4]:

AMB2-36 #911 RT: 4.06 AV: 1 NL: 7.64E7  
T: FTMS + p ESI Full ms [60.00-900.00]

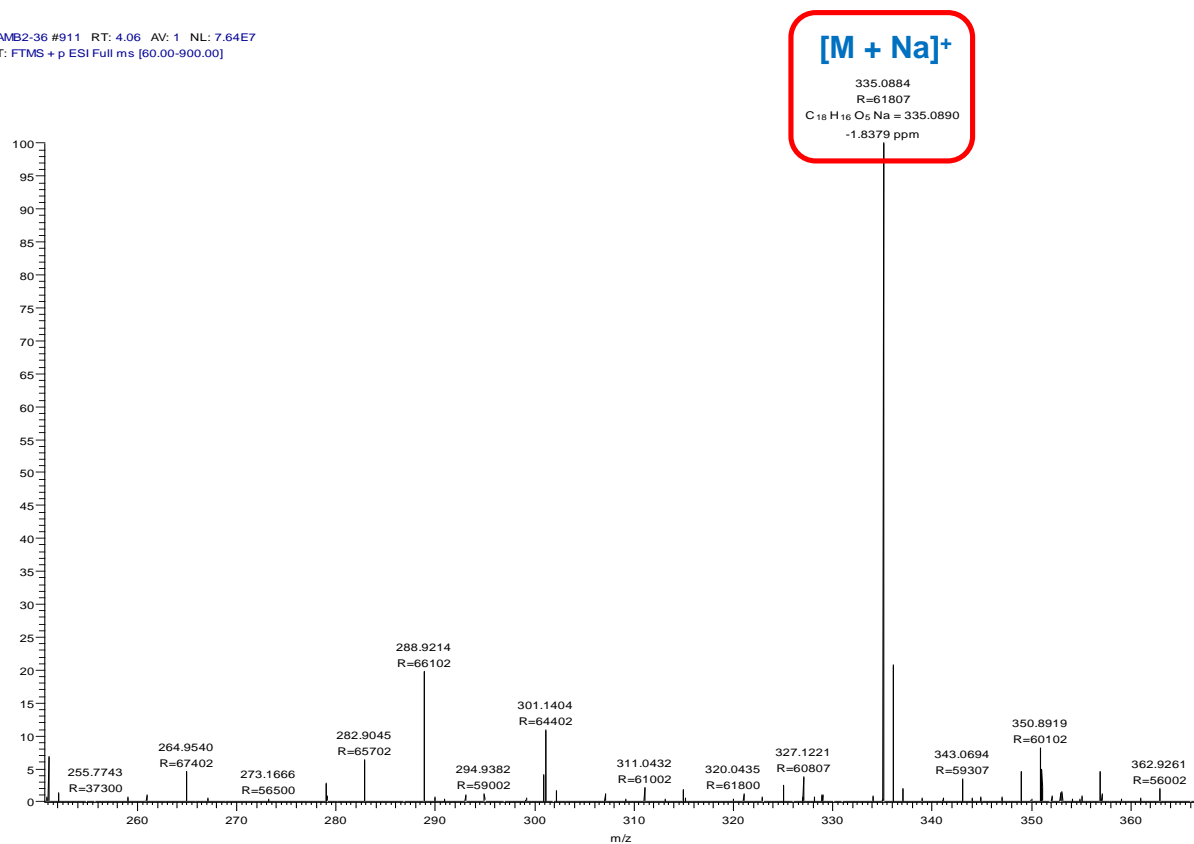

SI Fig.S3: HRMS spectrum of [4].

**$^1\text{H}$  NMR spectra of [1]:**

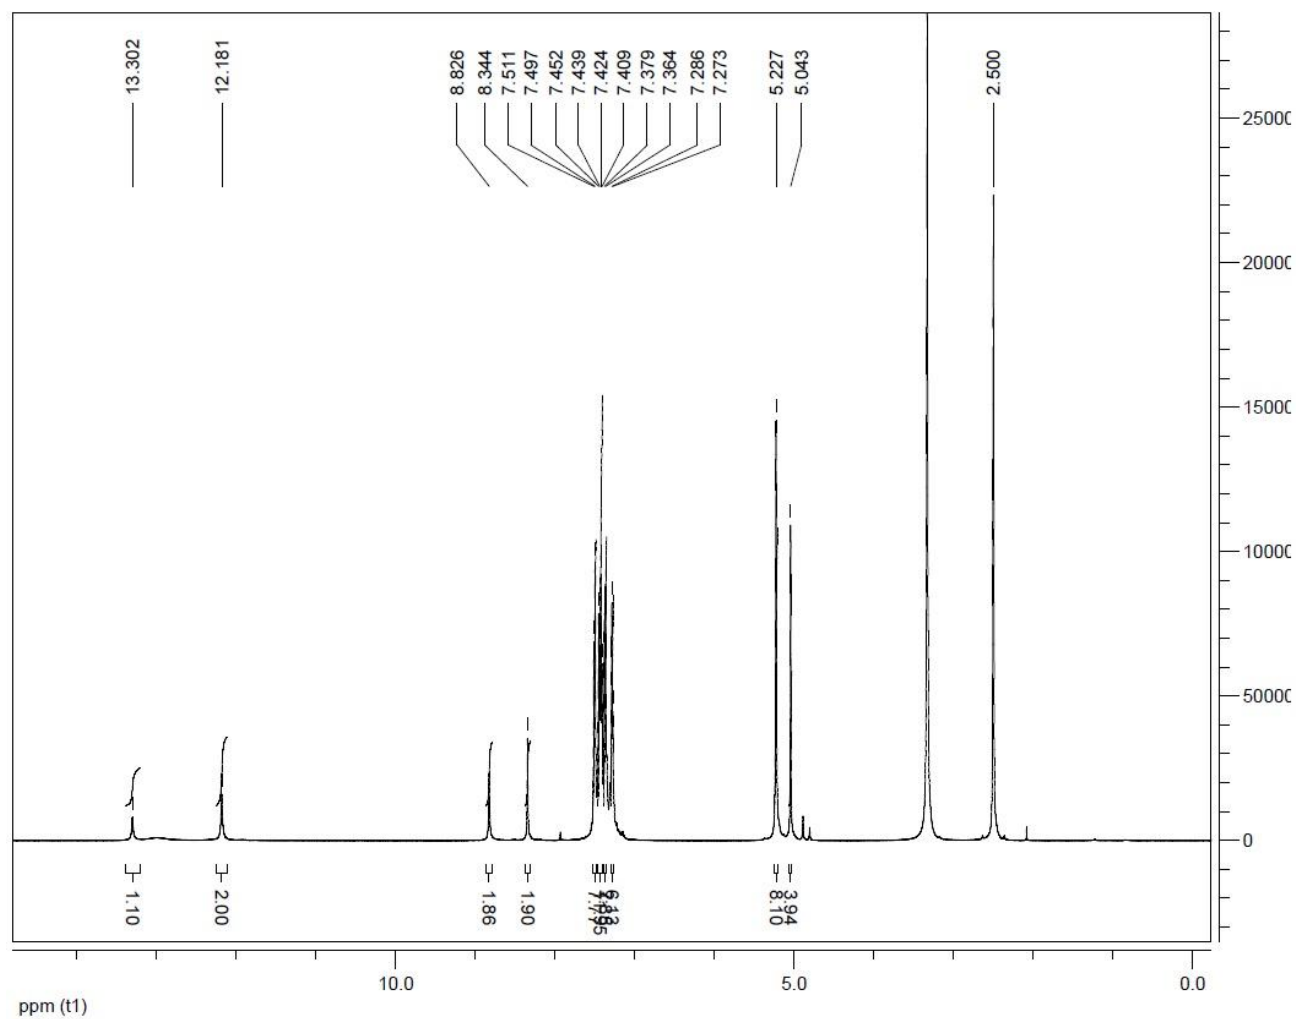

**SI Fig.S4:**  $^1\text{H}$  NMR spectra of [1] in  $\text{DMSO-d}_6$  recorded in 500 MHz.

**$^{13}\text{C}$  NMR spectra of [1]:**

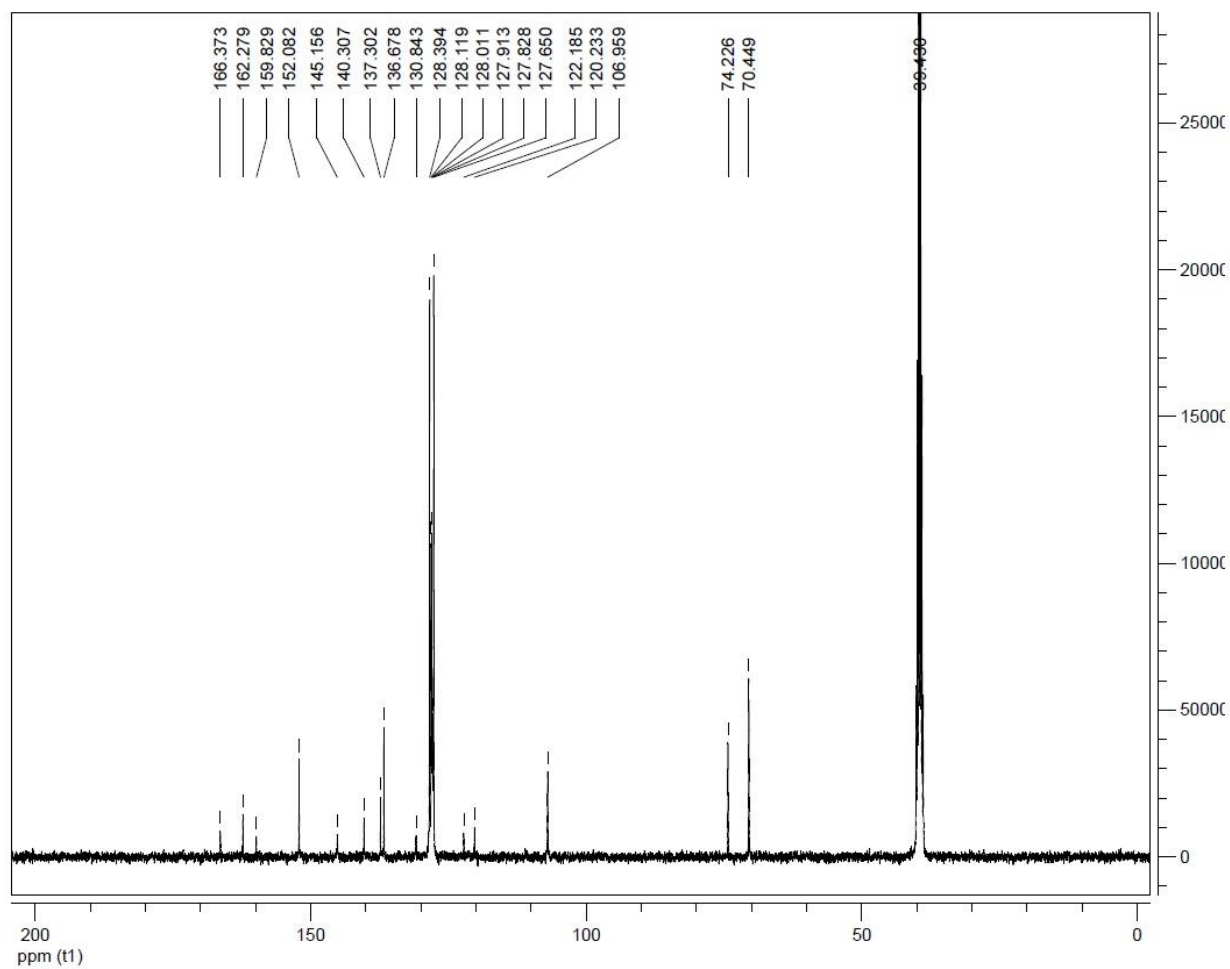

**SI Fig.S5:**  $^{13}\text{C}$  NMR spectra of [1] in DMSO- $\text{d}_6$  recorded in 400 MHz.

## Mass spectra of [1]:

AMB1-75\_141201125214 #2406 RT: 10.74 AV: 1 NL: 1.16E6  
T: FTMS + p ESI Full ms [100.00-1500.00]

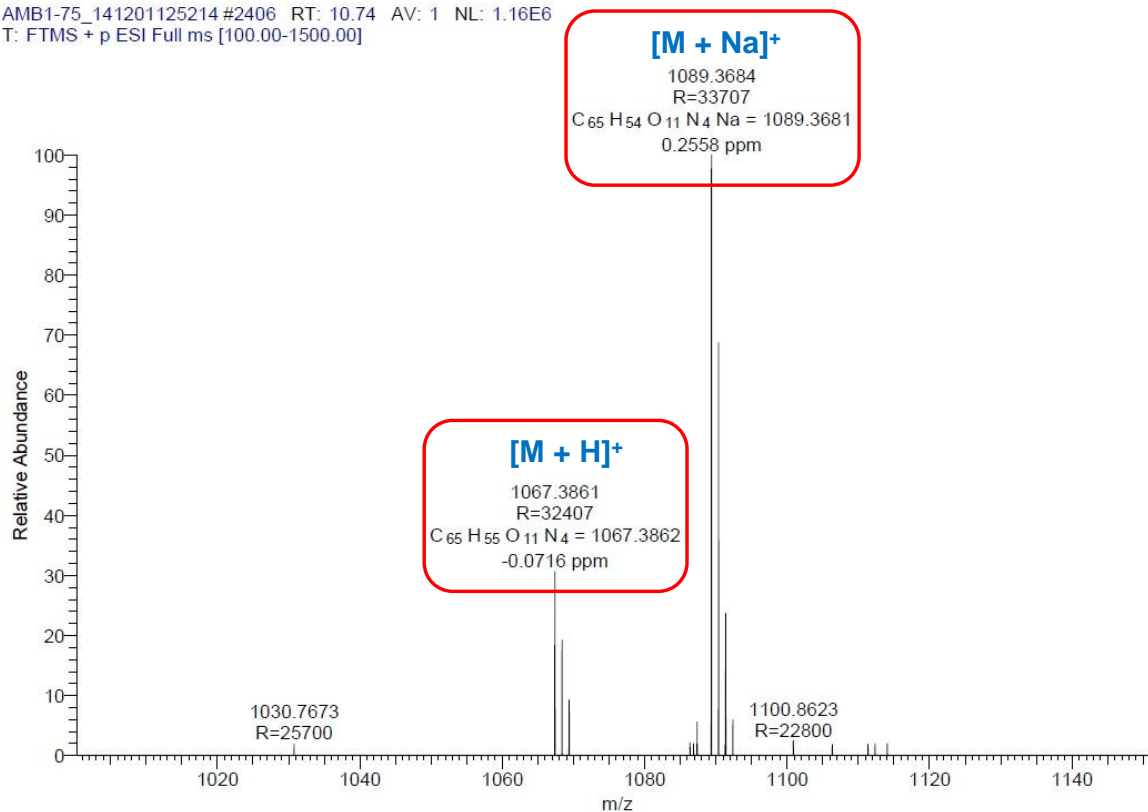

SI Fig.S6: HRMS spectrum of [1].

**$^1\text{H}$  NMR spectra of [2]:**

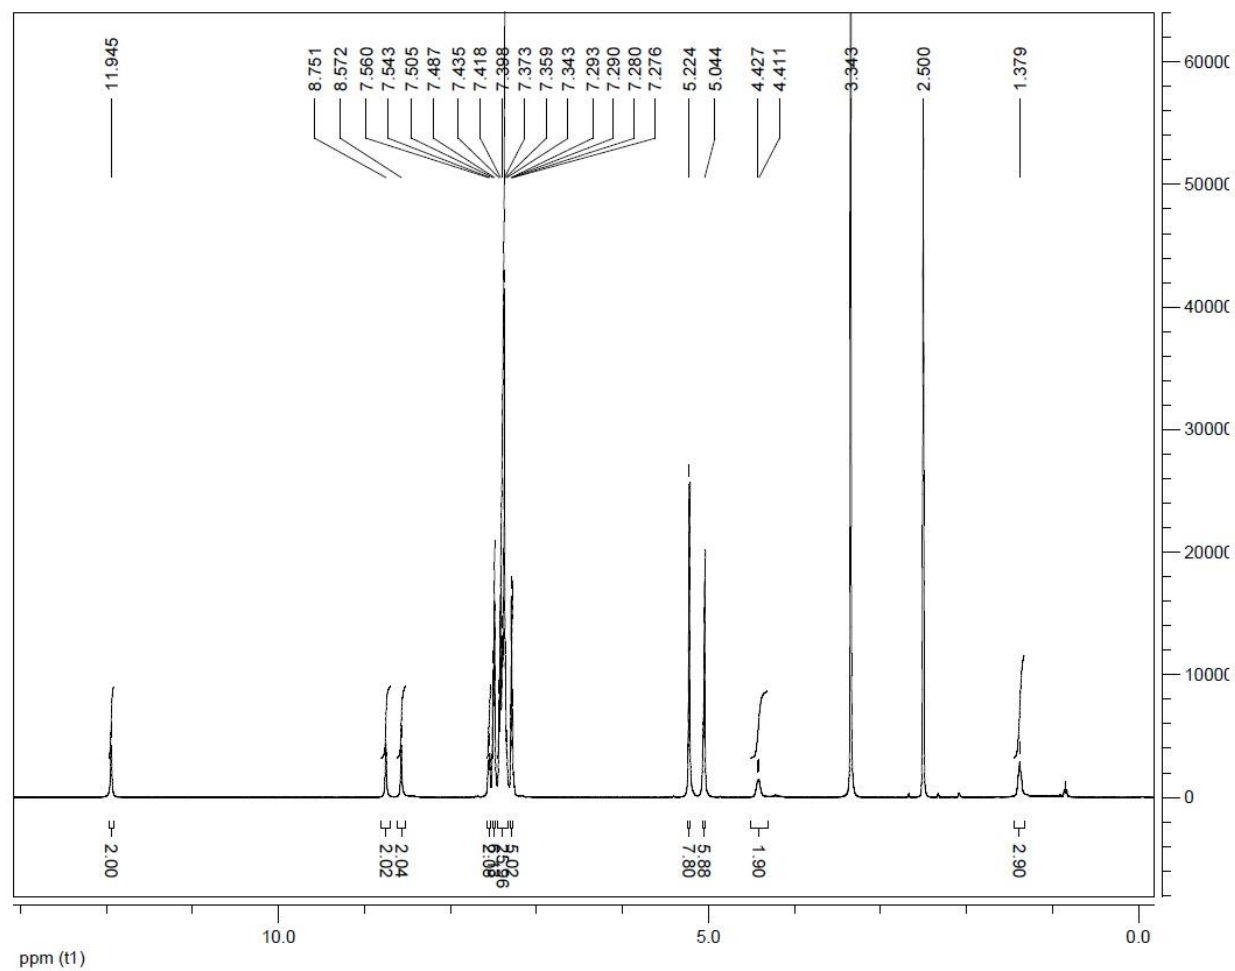

**SI Fig.S7:**  $^1\text{H}$  NMR spectra of [2] in DMSO- $d_6$  recorded in 400 MHz.

**$^{13}\text{C}$  NMR spectra of [2]:**

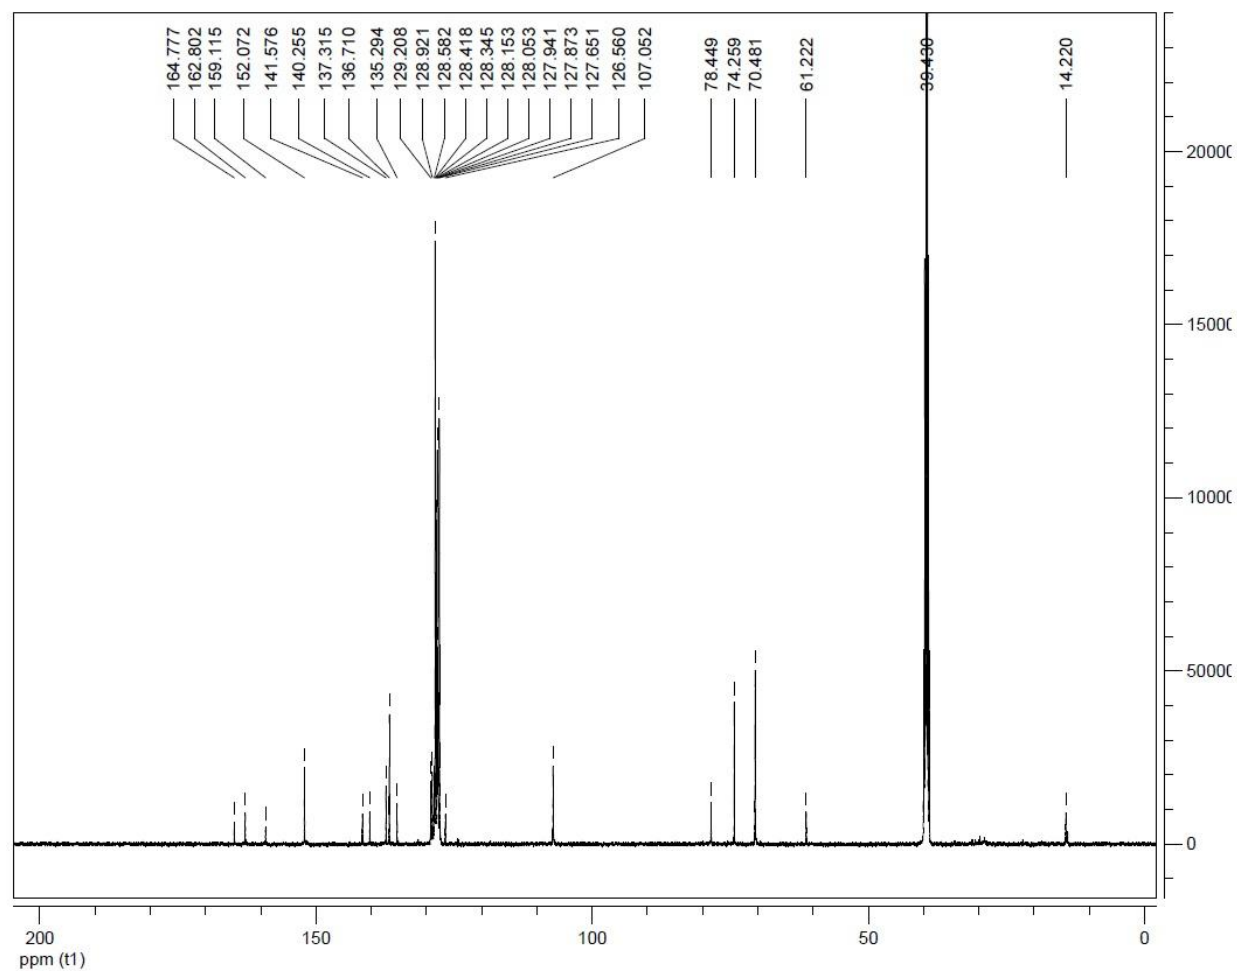

**SI Fig.S8:**  $^{13}\text{C}$  NMR spectra of [2] in DMSO- $\text{d}_6$  recorded in 500 MHz.

## Mass spectra of [2]:

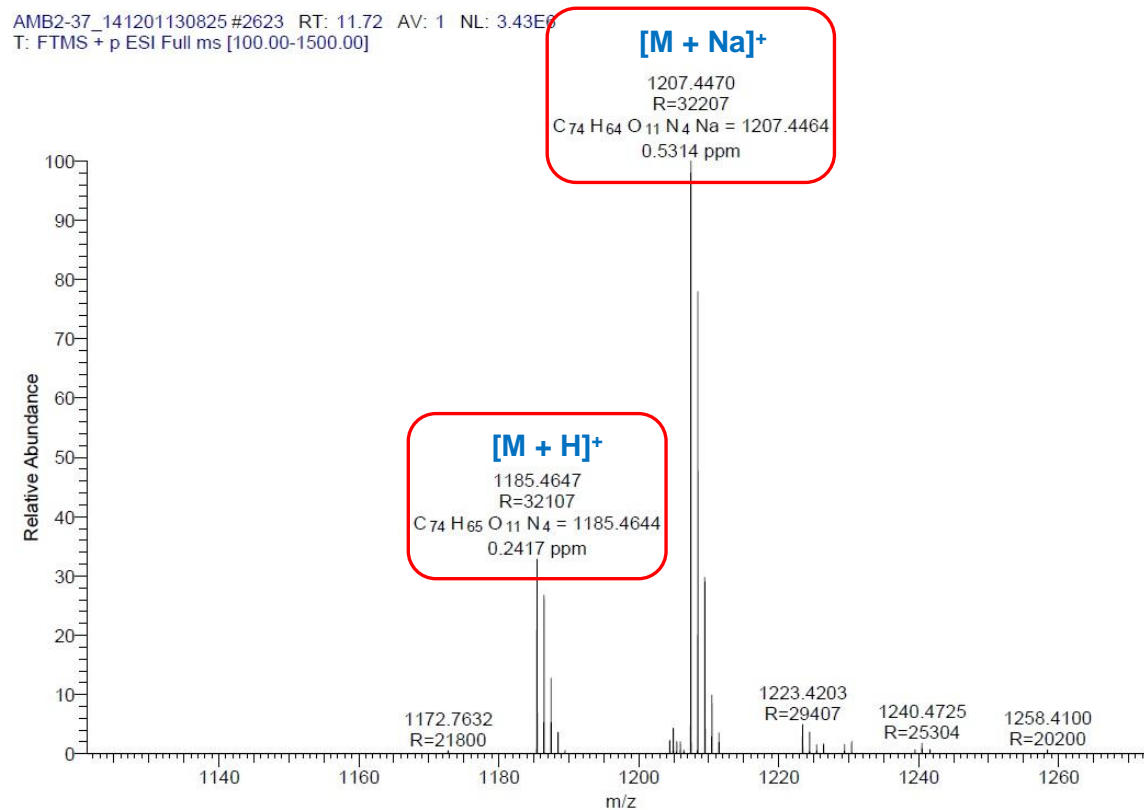

SI Fig.S9: HRMS Spectrum of [2].

**UV-Vis absorption spectra of [1]:**

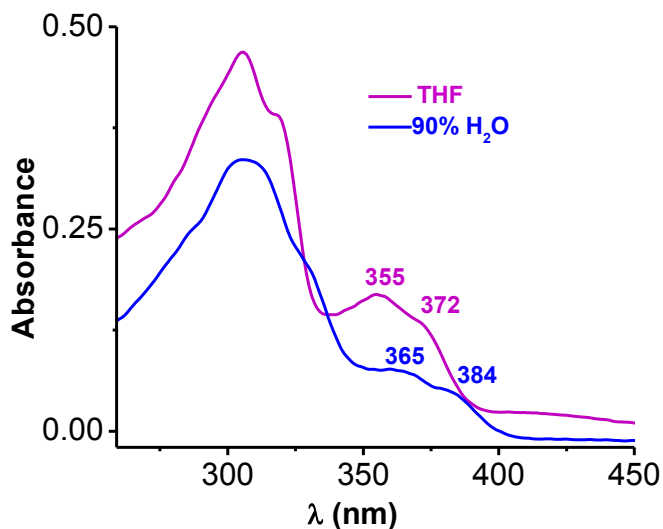

**SI Fig.S10:** Absorption spectra of **1** in pure THF and THF-water (1:9; v/v) mixture solution. Concentration used 10  $\mu$ M.

**Variable-temperature UV-Vis absorption spectra of [1]:**

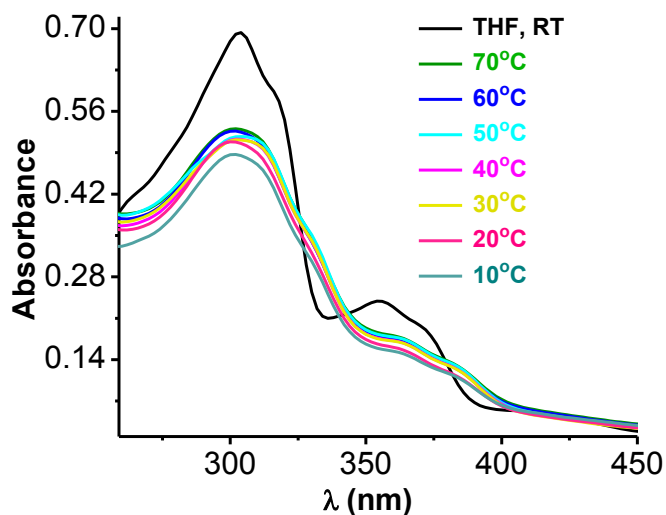

**SI Fig.S11:** Variable-temperature UV-Vis spectra of **1** (concentration used 10  $\mu$ M) in THF-water (3:7; v/v). Temperature varied from 10-70°C.

**Weight-loss profile (TGA plot) of [1]:**

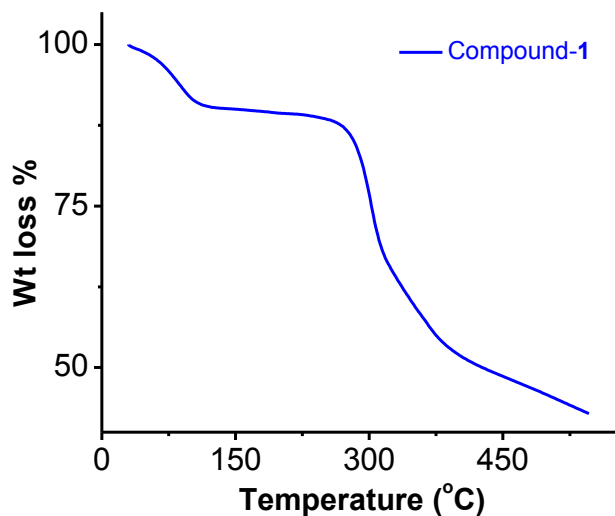

**SI Fig.S12:** Weight-loss profile for **1** obtained using thermogravimetric analysis (TGA).

**Comparisons between absorption and excitation spectra of [1]:**

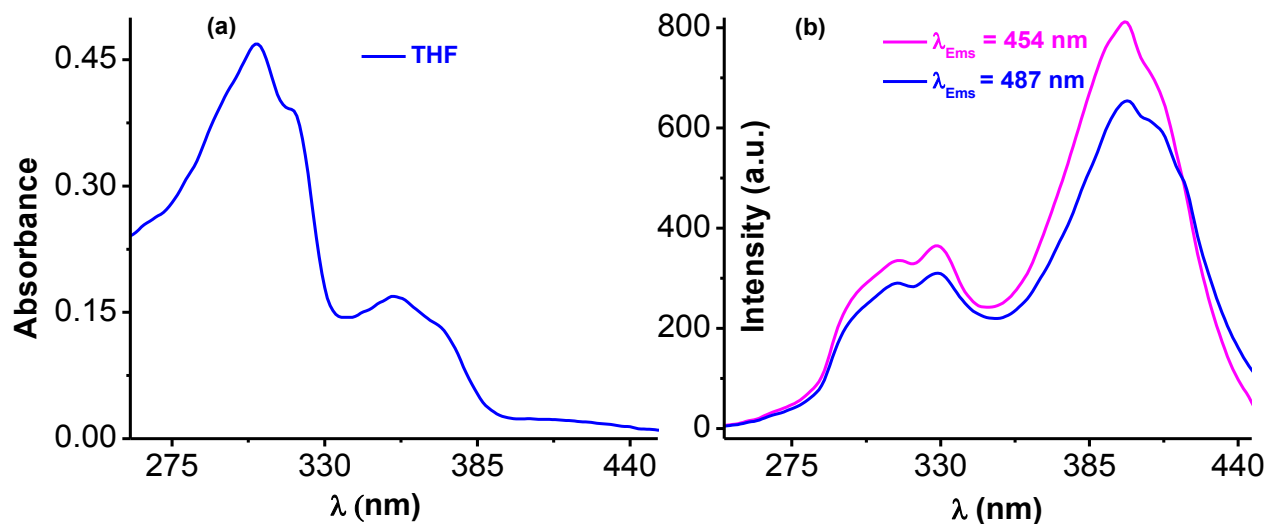

**SI Fig.S13:** a) Absorption and b) fluorescence excitation spectra ( $\lambda_{\text{Ems}} = 454$  and 487 nm) of **1** in THF.

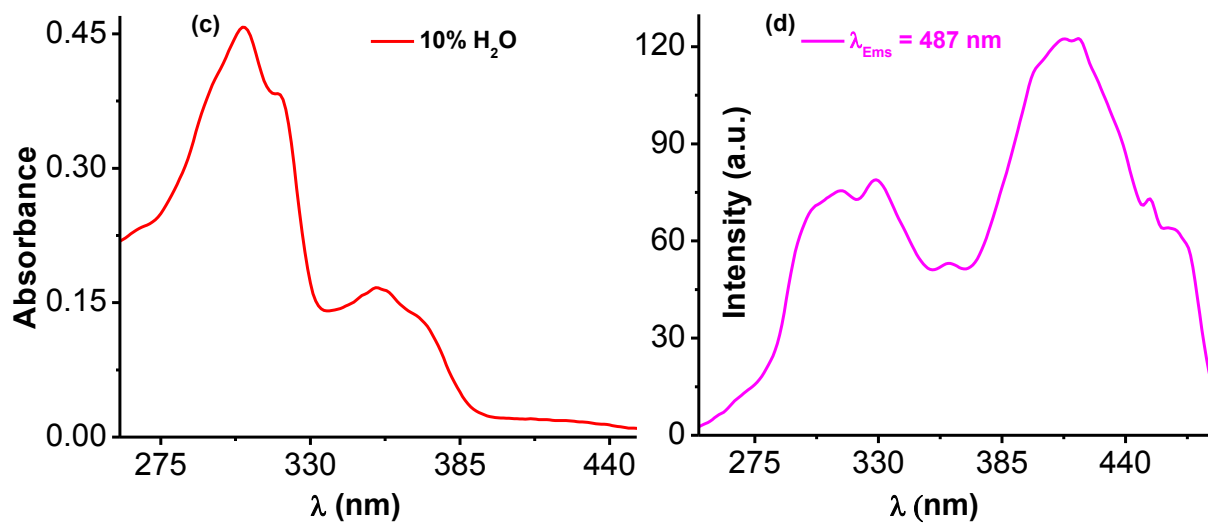

**SI Fig.S14:** a) Absorption and b) fluorescence excitation spectra ( $\lambda_{\text{Ems}} = 487$  nm) of **1** in THF-water (9:1; v/v).

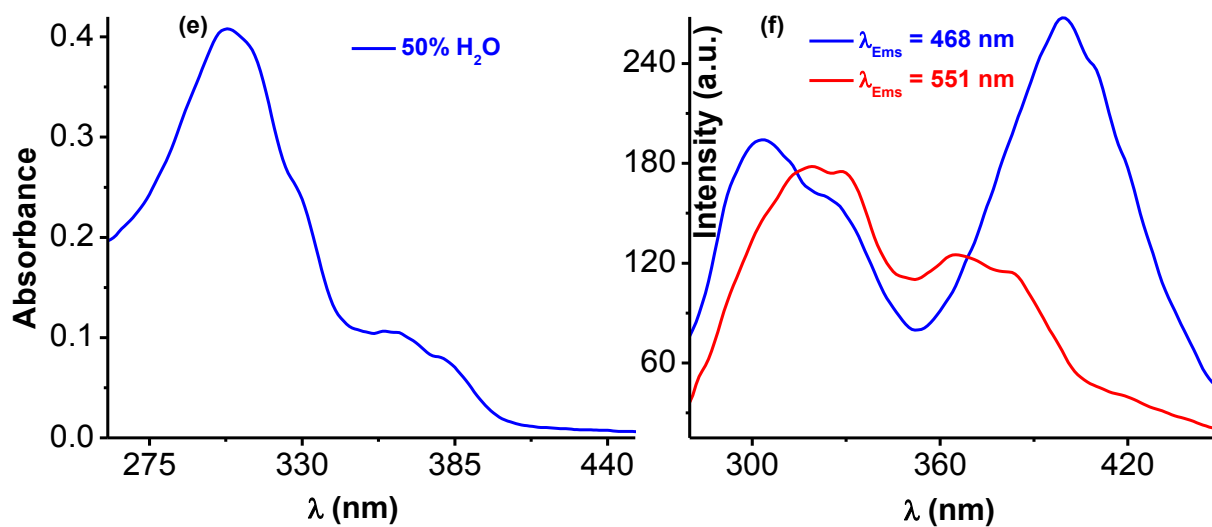

**SI Fig.S15:** a) Absorption and b) fluorescence excitation spectra ( $\lambda_{\text{Ems}} = 468$  and 551 nm) of **1** in THF-water (1:1; v/v).

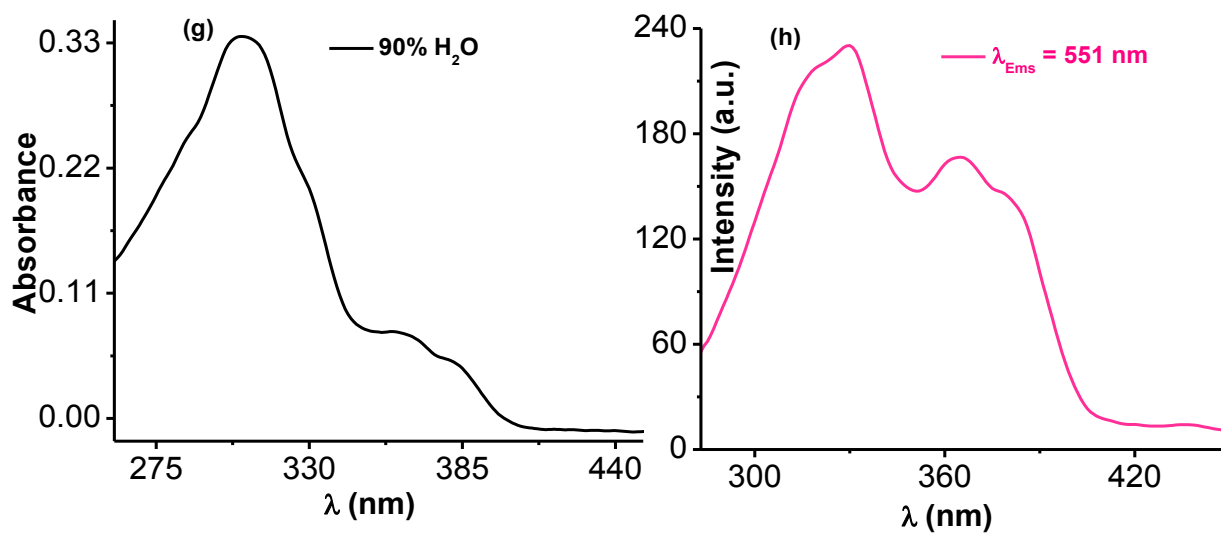

**SI Fig.S16:** a) Absorption and b) fluorescence excitation spectra ( $\lambda_{\text{Ems}} = 551$  nm) of **1** in THF-water (1:9; v/v).

#### UV-Vis absorption spectra of [2].

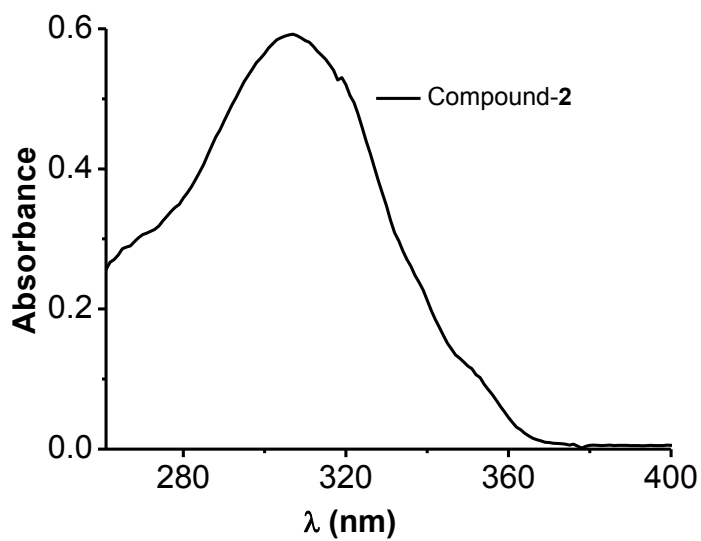

**SI Fig.S17:** Absorption spectra of **2** in pure THF. Concentration used 10  $\mu\text{M}$ .

**Solvent dependent emission spectra of [2]:**

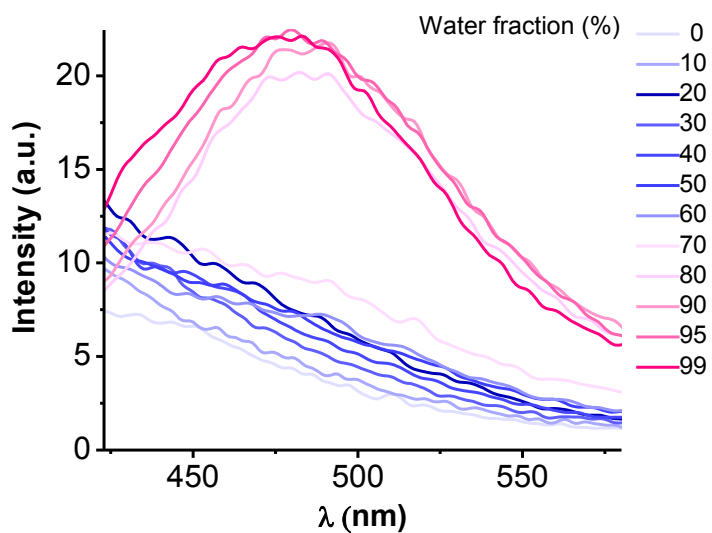

**SI Fig.S18:** luminescence spectra of **2** (10  $\mu\text{M}$ ) in THF and THF-water mixed solvent medium ( $\lambda_{\text{Ext}} = 306$  nm was used for luminescence studies).

**Emission spectra of [1] in different polarities of solvents:**

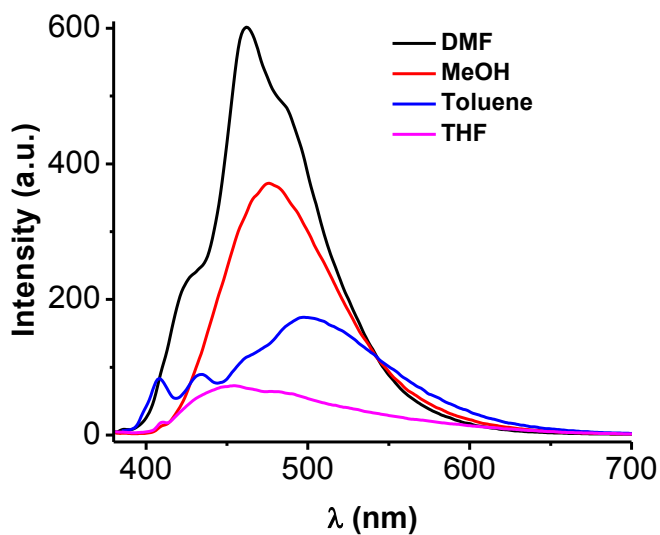

**SI Fig.S19:** Emission spectra of **1** (1  $\mu\text{M}$ ) in DMF, MeOH, THF and Toluene.  $\lambda_{\text{Ext}} = 365$  nm.

**Comparisons of FT-IR spectrum between compound [1] and [2]:**

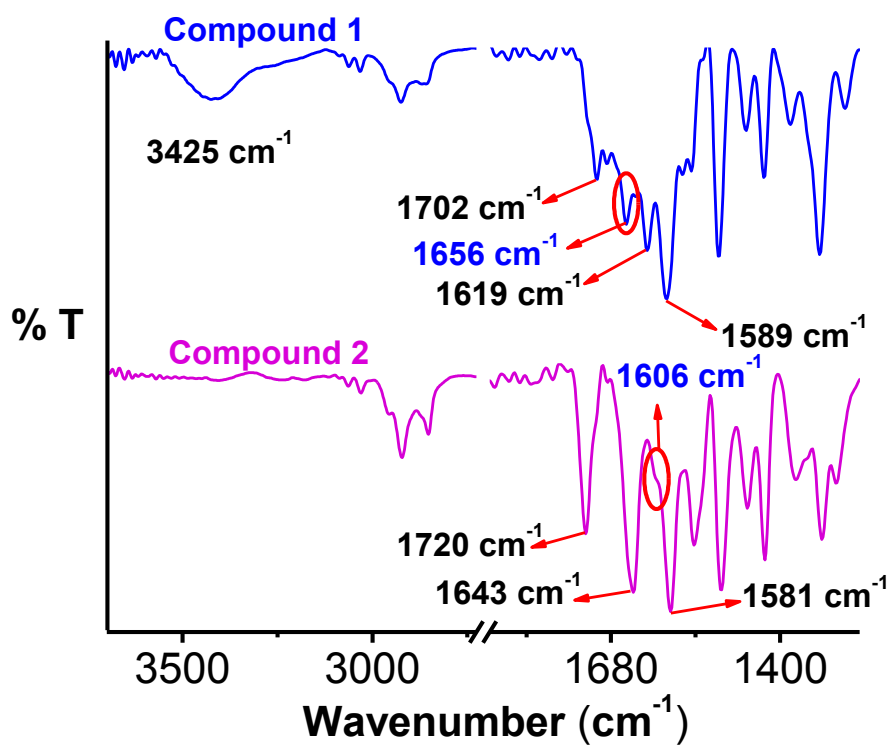

**SI Fig.S20:** Comparisons of FT-IR spectra of compound **1** and **2** at room temperature.

**SI Table.S1:** Important FT-IR frequency obtained from compound **1** and **2**.

|            |                                                                                                                                                                                                                                                                  |
|------------|------------------------------------------------------------------------------------------------------------------------------------------------------------------------------------------------------------------------------------------------------------------|
| Compound-1 | 3425 cm <sup>-1</sup> (-OH <sub>hydrogen bonded</sub> ), 1702 cm <sup>-1</sup> (-COOH <sub>str</sub> ), 1656 cm <sup>-1</sup> (-C=N <sub>str</sub> ),<br>1619 cm <sup>-1</sup> (-C=O <sub>amide, str</sub> ), 1589 cm <sup>-1</sup> (-NH <sub>amide, str</sub> ) |
| Compound-2 | 1720 cm <sup>-1</sup> (-COOEt <sub>str</sub> ), 1643 cm <sup>-1</sup> (-C=O <sub>amide, str</sub> ), 1606 cm <sup>-1</sup> (-C=N <sub>str</sub> ), 1581<br>cm <sup>-1</sup> (-NH <sub>amide, str</sub> )                                                         |

**Gelation study of [2]:**

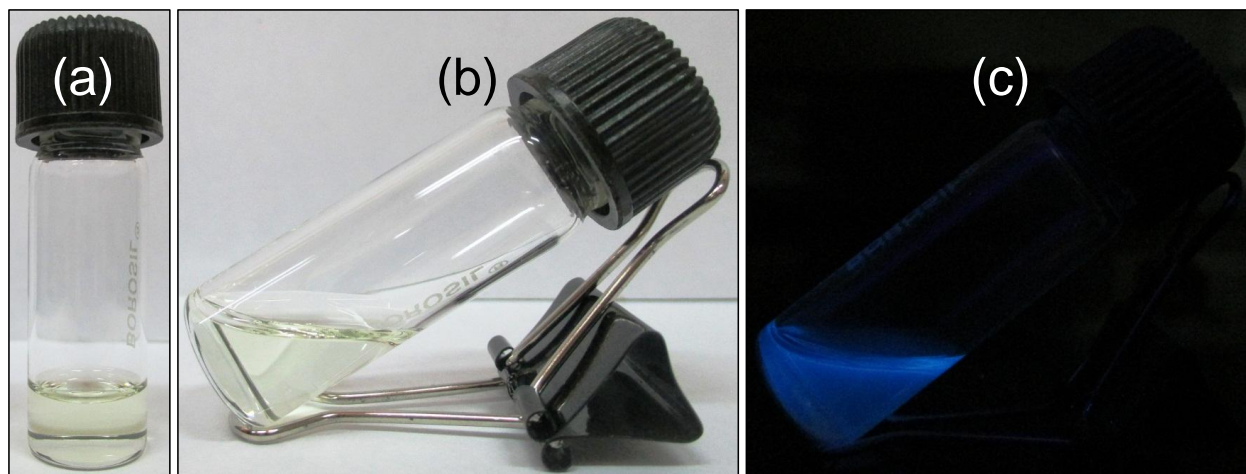

**SI Fig.S21:** Photographs of THF solution of compound 2 (a) immediately after dissolving the compound (16.0 mg/mL of THF) by gentle heating; (b) after 24 hrs upon cooling to room temperature; (c) under 365 nm UV light. Indicating Under identical condition or even higher concentration [compare to compound- 1 (10.0 mg/ mL of THF)] compound-2 is unable to give gel.

**Photographs showing the changes of emission color of 1:**

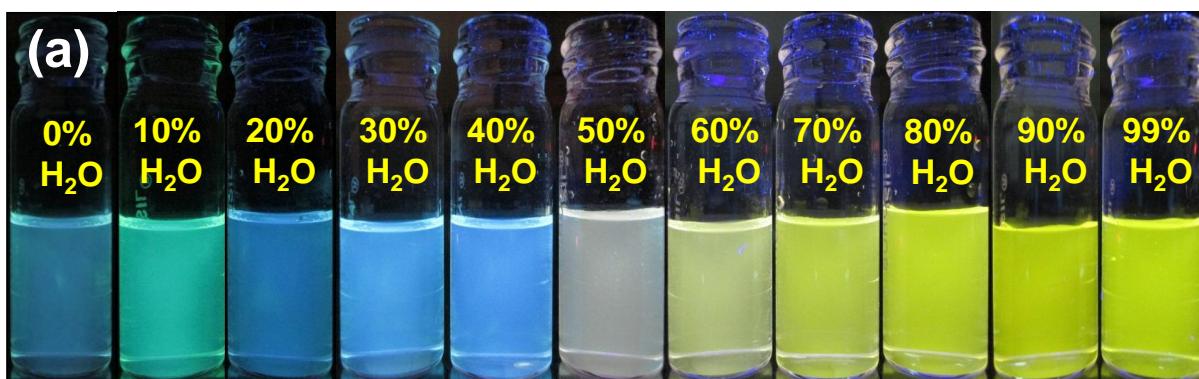

**SI Fig.S22:** (a) Photographs showing the changes of emission color with gradual increase of water (%) into THF solution of 1.

**Schematic route for gelation of [1]:**

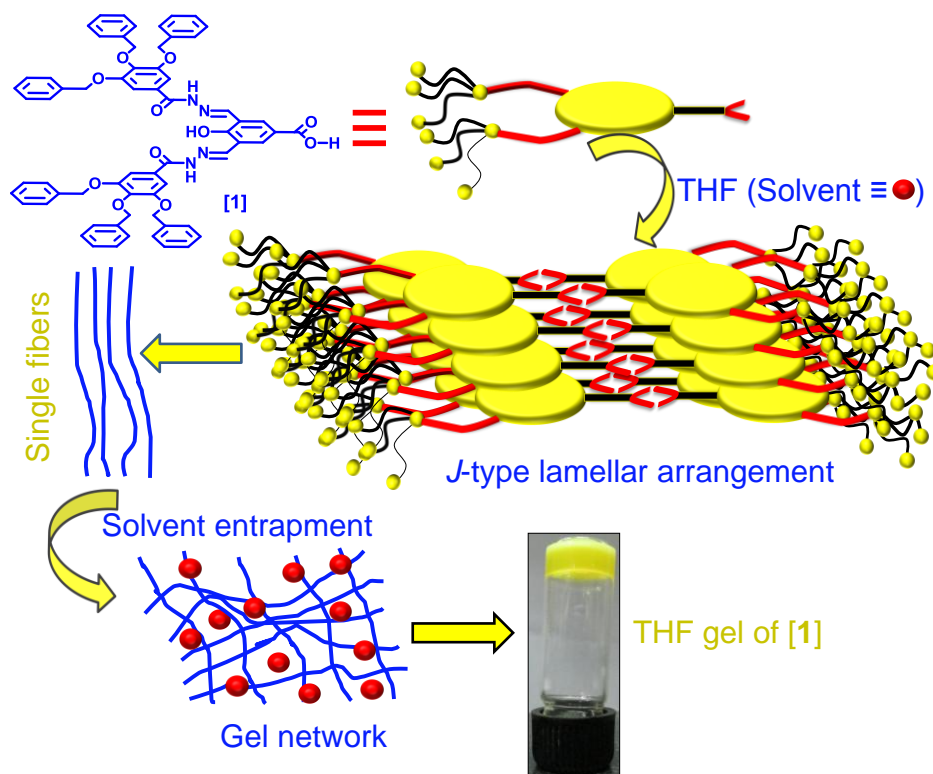

**SI Fig.S23:** A schematic route for the synthesis of THF gel of **1** and its molecular arrangement.

**Rheological property of [1]:**

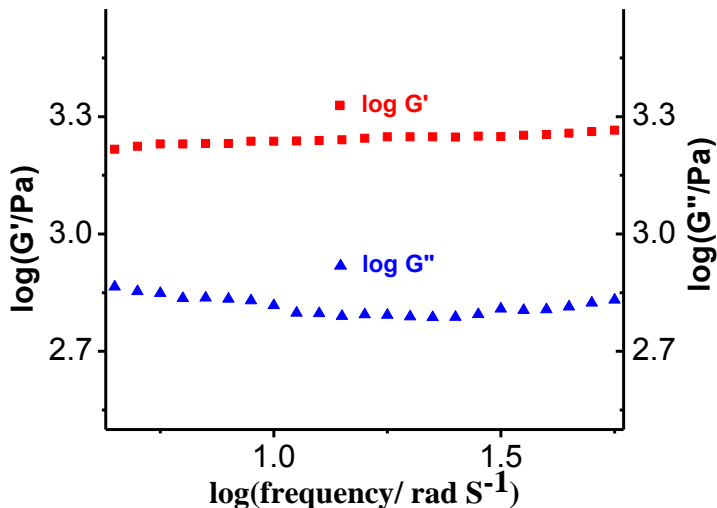

**SI Fig.S24:** Dynamic frequency sweep measurement of storage modulus ( $G'$ ) and loss modulus ( $G''$ ) for THF gel (1.0 wt. %) of **1**. Strain used was 0.1%.

**XRPD pattern of [1]:**

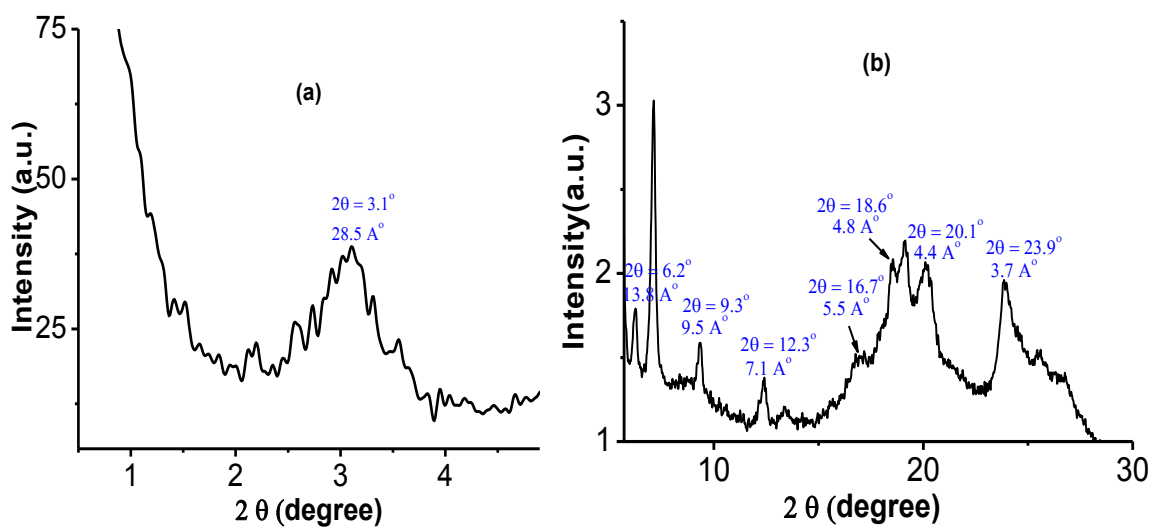

**SI Fig.S25:** (a) Small angle and (b) wide angle XRPD diffraction pattern of **1** in xerogel state.

**I-V characteristic plot of [1]:**

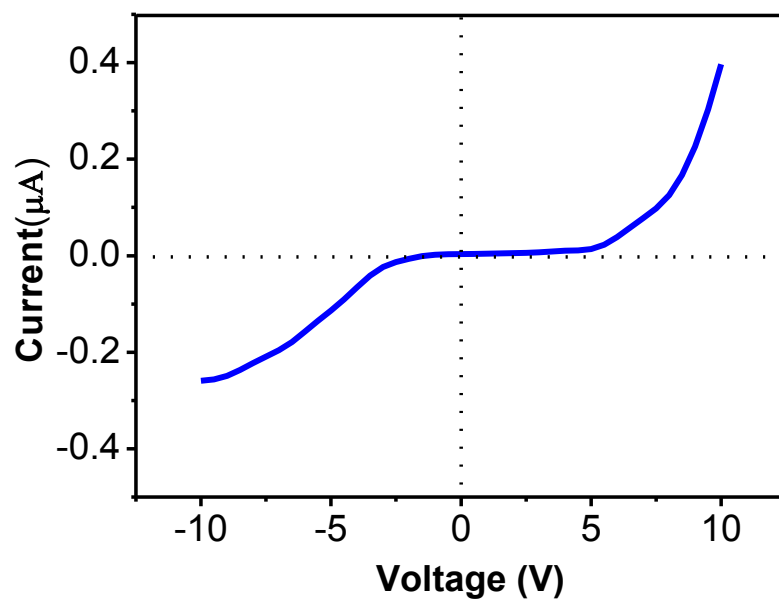

**SI Fig.S26:** *I-V* characteristic plot obtained from **1**.

**Solvent dependent FESEM images of [1]:**

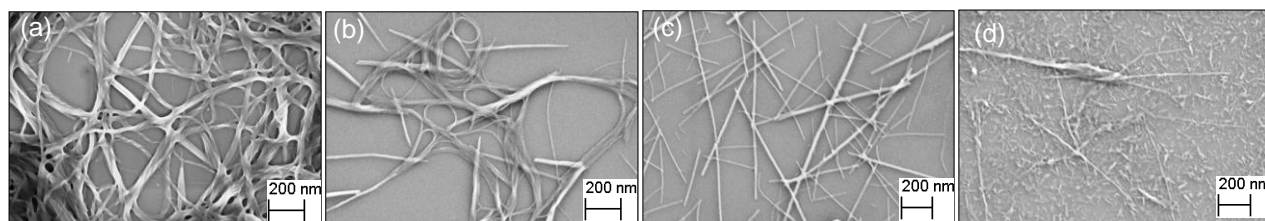

**SI Fig.S27:** Solvent dependent FESEM images of **1** having (a) 0, (b) 10, (c) 50 and (d), 90 % water content in THF. Concentration used was 100μM.
